# Supplementary material for: Depressive symptom networks in the UK general adolescent population and in those looked after by local authorities
Source: HighWire-hosted journal article supplement (doi:10.1136/bmjment-2023-300707), 2023-08-01
Supplement: bmjment-2023-300707supp003_data_supplement.pdf [file bmjment-2023-300707supp003_data_supplement.pdf]

| name      | type | node1       | node2       | value      | id                     |
|-----------|------|-------------|-------------|------------|------------------------|
| 55 sample | edge | lonl        | nolove      | 0,25439076 | lonl--nolove           |
| 26 sample | edge | nogood      | selfhate    | 0,2389758  | nogood--selfhate       |
| 36 sample | edge | selfhate    | badpers     | 0,22796414 | selfhate--badpers      |
| 78 sample | edge | nogoodasoth | evthwrong   | 0,22372213 | nogoodasoth--evthwrong |
| 15 sample | edge | nogood      | cried       | 0,2183755  | nogood--cried          |
| 6 sample  | edge | tired       | restl       | 0,21059503 | tired--restl           |
| 75 sample | edge | badpers     | evthwrong   | 0,20500725 | badpers--evthwrong     |
| 19 sample | edge | restl       | concent     | 0,19398987 | restl--concent         |
| 66 sample | edge | nolove      | nogoodasoth | 0,18470318 | nolove--nogoodasoth    |
| 3 sample  | edge | enjoy       | tired       | 0,17836975 | enjoy--tired           |
| 1 sample  | edge | miser       | enjoy       | 0,16900127 | miser--enjoy           |
| 18 sample | edge | tired       | concent     | 0,15564565 | tired--concent         |
| 8 sample  | edge | enjoy       | nogood      | 0,14903836 | enjoy--nogood          |
| 65 sample | edge | lonl        | nogoodasoth | 0,14795042 | lonl--nogoodasoth      |
| 16 sample | edge | miser       | concent     | 0,14394387 | miser--concent         |
| 37 sample | edge | miser       | lonl        | 0,14349157 | miser--lonl            |
| 2 sample  | edge | miser       | tired       | 0,13194371 | miser--tired           |
| 27 sample | edge | cried       | selfhate    | 0,12508631 | cried--selfhate        |
| 53 sample | edge | selfhate    | nolove      | 0,12287802 | selfhate--nolove       |
| 74 sample | edge | selfhate    | evthwrong   | 0,12163152 | selfhate--evthwrong    |
| 77 sample | edge | nolove      | evthwrong   | 0,11981484 | nolove--evthwrong      |
| 63 sample | edge | selfhate    | nogoodasoth | 0,11383534 | selfhate--nogoodasoth  |
| 11 sample | edge | miser       | cried       | 0,10615234 | miser--cried           |
| 44 sample | edge | selfhate    | lonl        | 0,1028904  | selfhate--lonl         |
| 5 sample  | edge | enjoy       | restl       | 0,10237575 | enjoy--restl           |
| 54 sample | edge | badpers     | nolove      | 0,10123137 | badpers--nolove        |
| 50 sample | edge | nogood      | nolove      | 0,09944749 | nogood--nolove         |
| 60 sample | edge | nogood      | nogoodasoth | 0,09819134 | nogood--nogoodasoth    |
| 10 sample | edge | restl       | nogood      | 0,09345817 | restl--nogood          |
| 21 sample | edge | cried       | concent     | 0,09214978 | cried--concent         |
| 71 sample | edge | nogood      | evthwrong   | 0,08930837 | nogood--evthwrong      |
| 51 sample | edge | cried       | nolove      | 0,07927634 | cried--nolove          |
| 76 sample | edge | lonl        | evthwrong   | 0,07801089 | lonl--evthwrong        |
| 7 sample  | edge | miser       | nogood      | 0,07446556 | miser--nogood          |
| 4 sample  | edge | miser       | restl       | 0,07086345 | miser--restl           |
| 42 sample | edge | cried       | lonl        | 0,06915973 | cried--lonl            |
| 20 sample | edge | nogood      | concent     | 0,06895556 | nogood--concent        |
| 73 sample | edge | concent     | evthwrong   | 0,06806234 | concent--evthwrong     |
| 30 sample | edge | enjoy       | badpers     | 0,06315552 | enjoy--badpers         |
| 62 sample | edge | concent     | nogoodasoth | 0,06084278 | concent--nogoodasoth   |
| 41 sample | edge | nogood      | lonl        | 0,0572756  | nogood--lonl           |
| 43 sample | edge | concent     | lonl        | 0,05629049 | concent--lonl          |
| 22 sample | edge | miser       | selfhate    | 0,05111565 | miser--selfhate        |
| 72 sample | edge | cried       | evthwrong   | 0,04544739 | cried--evthwrong       |
| 23 sample | edge | enjoy       | selfhate    | 0,03866623 | enjoy--selfhate        |
| 32 sample | edge | restl       | badpers     | 0,03781368 | restl--badpers         |
| 56 sample | edge | miser       | nogoodasoth | 0,03592932 | miser--nogoodasoth     |
| 17 sample | edge | enjoy       | concent     | 0,02701748 | enjoy--concent         |
| 39 sample | edge | tired       | lonl        | 0,02502602 | tired--lonl            |

|           |      |         |             |             |                 |
|-----------|------|---------|-------------|-------------|-----------------|
| 68 sample | edge | enjoy   | evthwrong   | 0,02379409  | enjoy--evthwr   |
| 31 sample | edge | tired   | badpers     | 0,02363304  | tired--badpers  |
| 45 sample | edge | badpers | lonl        | 0,02348256  | badpers--lonl   |
| 33 sample | edge | nogood  | badpers     | 0,02137029  | nogood--badp    |
| 64 sample | edge | badpers | nogoodasoth | 0,02117421  | badpers--nogc   |
| 47 sample | edge | enjoy   | nolove      | 0,01963169  | enjoy--nolove   |
| 40 sample | edge | restl   | lonl        | 0,01657702  | restl--lonl     |
| 35 sample | edge | concent | badpers     | 0,01597653  | concent--badp   |
| 38 sample | edge | enjoy   | lonl        | 0,01436651  | enjoy--lonl     |
| 9 sample  | edge | tired   | nogood      | 0,01159891  | tired--nogood   |
| 70 sample | edge | restl   | evthwrong   | 0,01095476  | restl--evthwro  |
| 12 sample | edge | enjoy   | cried       | 0,00771701  | enjoy--cried    |
| 58 sample | edge | tired   | nogoodasoth | 0,00644733  | tired--nogood;  |
| 14 sample | edge | restl   | cried       | 0,00297046  | restl--cried    |
| 29 sample | edge | miser   | badpers     | 0,00230966  | miser--badper   |
| 69 sample | edge | tired   | evthwrong   | 0,00085006  | tired--evthwrc  |
| 34 sample | edge | cried   | badpers     | 0,00041172  | cried--badpers  |
| 13 sample | edge | tired   | cried       | 0           | tired--cried    |
| 24 sample | edge | tired   | selfhate    | 0           | tired--selfhate |
| 25 sample | edge | restl   | selfhate    | 0           | restl--selfhate |
| 28 sample | edge | concent | selfhate    | 0           | concent--selfh  |
| 46 sample | edge | miser   | nolove      | 0           | miser--nolove   |
| 49 sample | edge | restl   | nolove      | 0           | restl--nolove   |
| 52 sample | edge | concent | nolove      | 0           | concent--nolo'  |
| 57 sample | edge | enjoy   | nogoodasoth | 0           | enjoy--nogoc    |
| 59 sample | edge | restl   | nogoodasoth | 0           | restl--nogooda  |
| 61 sample | edge | cried   | nogoodasoth | 0           | cried--nogood   |
| 67 sample | edge | miser   | evthwrong   | 0           | miser--evthwr   |
| 48 sample | edge | tired   | nolove      | -0,02049016 | tired--nolove   |

This table depicts the edge weights of the two nodes as regularized partial correlations:

Tired = Felt tired; selfhate = I hated myself; restl = Restless;

no love = Nobody really loved me; nogoodasoth = Not as good as other kids;

nogood = I was no good anymore; miser = Miserable/unhappy; lonl = Felt lonely;

evthwrong = Did everything wrong; enjoy = Did not enjoy anything; cried = Cried a lot;

concent = Hard to concentrate; badpers = I was a bad person
