# Supplementary material for: Depressive symptom networks in the UK general adolescent population and in those looked after by local authorities
Source: HighWire-hosted journal article supplement (doi:10.1136/bmjment-2023-300707), 2023-08-01
Supplement: bmjment-2023-300707supp004_data_supplement.pdf [file bmjment-2023-300707supp004_data_supplement.pdf]

| name      | type | node1       | node2       | value      | id              |
|-----------|------|-------------|-------------|------------|-----------------|
| 36 sample | edge | selfhate    | badpers     | 0,3020945  | selfhate--badp  |
| 55 sample | edge | lonl        | nolove      | 0,27589851 | lonl--nolove    |
| 16 sample | edge | miser       | concent     | 0,2517546  | miser--concen   |
| 15 sample | edge | nogood      | cried       | 0,24950848 | nogood--cried   |
| 50 sample | edge | nogood      | nolove      | 0,23573947 | nogood--nolov   |
| 11 sample | edge | miser       | cried       | 0,22217007 | miser--cried    |
| 75 sample | edge | badpers     | evthwrong   | 0,1916863  | badpers--evth'  |
| 53 sample | edge | selfhate    | nolove      | 0,17016634 | selfhate--nolo' |
| 54 sample | edge | badpers     | nolove      | 0,16993505 | badpers--nolo'  |
| 6 sample  | edge | tired       | restl       | 0,16223699 | tired--restl    |
| 39 sample | edge | tired       | lonl        | 0,16215958 | tired--lonl     |
| 70 sample | edge | restl       | evthwrong   | 0,15813937 | restl--evthwro  |
| 64 sample | edge | badpers     | nogoodasoth | 0,14967915 | badpers--nogc   |
| 44 sample | edge | selfhate    | lonl        | 0,14080058 | selfhate--lonl  |
| 78 sample | edge | nogoodasoth | evthwrong   | 0,13348334 | nogoodasoth--   |
| 3 sample  | edge | enjoy       | tired       | 0,13086422 | enjoy--tired    |
| 74 sample | edge | selfhate    | evthwrong   | 0,13062533 | selfhate--evth' |
| 19 sample | edge | restl       | concent     | 0,12995095 | restl--concent  |
| 20 sample | edge | nogood      | concent     | 0,11844578 | nogood--conce   |
| 26 sample | edge | nogood      | selfhate    | 0,11522867 | nogood--selfh   |
| 42 sample | edge | cried       | lonl        | 0,10988971 | cried--lonl     |
| 62 sample | edge | concent     | nogoodasoth | 0,1052527  | concent--nogc   |
| 66 sample | edge | nolove      | nogoodasoth | 0,09977449 | nolove--nogoc   |
| 56 sample | edge | miser       | nogoodasoth | 0,09865968 | miser--nogoc    |
| 71 sample | edge | nogood      | evthwrong   | 0,0926464  | nogood--evth    |
| 33 sample | edge | nogood      | badpers     | 0,08917917 | nogood--badp    |
| 72 sample | edge | cried       | evthwrong   | 0,08366152 | cried--evthwrc  |
| 68 sample | edge | enjoy       | evthwrong   | 0,08165839 | enjoy--evthwr   |
| 65 sample | edge | lonl        | nogoodasoth | 0,08099595 | lonl--nogooda:  |
| 34 sample | edge | cried       | badpers     | 0,07574174 | cried--badpers  |
| 21 sample | edge | cried       | concent     | 0,07212264 | cried--concent  |
| 2 sample  | edge | miser       | tired       | 0,07150038 | miser--tired    |
| 28 sample | edge | concent     | selfhate    | 0,07010446 | concent--selfh  |
| 37 sample | edge | miser       | lonl        | 0,06888656 | miser--lonl     |
| 5 sample  | edge | enjoy       | restl       | 0,06180981 | enjoy--restl    |
| 63 sample | edge | selfhate    | nogoodasoth | 0,06106199 | selfhate--nogc  |
| 45 sample | edge | badpers     | lonl        | 0,05054121 | badpers--lonl   |
| 58 sample | edge | tired       | nogoodasoth | 0,04566872 | tired--nogood:  |
| 76 sample | edge | lonl        | evthwrong   | 0,04506143 | lonl--evthwr    |
| 1 sample  | edge | miser       | enjoy       | 0,03950719 | miser--enjoy    |
| 43 sample | edge | concent     | lonl        | 0,03899568 | concent--lonl   |
| 29 sample | edge | miser       | badpers     | 0,03643687 | miser--badper   |
| 69 sample | edge | tired       | evthwrong   | 0,03493107 | tired--evthwrc  |
| 13 sample | edge | tired       | cried       | 0,02847542 | tired--cried    |
| 73 sample | edge | concent     | evthwrong   | 0,02770635 | concent--evth'  |
| 77 sample | edge | nolove      | evthwrong   | 0,02627214 | nolove--evthw   |
| 17 sample | edge | enjoy       | concent     | 0,02605682 | enjoy--concen   |
| 12 sample | edge | enjoy       | cried       | 0,02430141 | enjoy--cried    |
| 14 sample | edge | restl       | cried       | 0,01913385 | restl--cried    |

|           |      |         |             |             |                     |
|-----------|------|---------|-------------|-------------|---------------------|
| 18 sample | edge | tired   | concent     | 0,01676422  | tired--concent      |
| 59 sample | edge | restl   | nogoodasoth | 0,01624937  | restl--nogoodasoth  |
| 4 sample  | edge | miser   | restl       | 0,01089991  | miser--restl        |
| 25 sample | edge | restl   | selfhate    | 0,00872165  | restl--selfhate     |
| 51 sample | edge | cried   | nolove      | 0,00812223  | cried--nolove       |
| 10 sample | edge | restl   | nogood      | 0,00723462  | restl--nogood       |
| 61 sample | edge | cried   | nogoodasoth | 0,00573511  | cried--nogoodasoth  |
| 7 sample  | edge | miser   | nogood      | 0           | miser--nogood       |
| 8 sample  | edge | enjoy   | nogood      | 0           | enjoy--nogood       |
| 9 sample  | edge | tired   | nogood      | 0           | tired--nogood       |
| 22 sample | edge | miser   | selfhate    | 0           | miser--selfhate     |
| 24 sample | edge | tired   | selfhate    | 0           | tired--selfhate     |
| 27 sample | edge | cried   | selfhate    | 0           | cried--selfhate     |
| 32 sample | edge | restl   | badpers     | 0           | restl--badpers      |
| 35 sample | edge | concent | badpers     | 0           | concent--badpers    |
| 38 sample | edge | enjoy   | lonl        | 0           | enjoy--lonl         |
| 40 sample | edge | restl   | lonl        | 0           | restl--lonl         |
| 41 sample | edge | nogood  | lonl        | 0           | nogood--lonl        |
| 46 sample | edge | miser   | nolove      | 0           | miser--nolove       |
| 47 sample | edge | enjoy   | nolove      | 0           | enjoy--nolove       |
| 48 sample | edge | tired   | nolove      | 0           | tired--nolove       |
| 49 sample | edge | restl   | nolove      | 0           | restl--nolove       |
| 52 sample | edge | concent | nolove      | 0           | concent--nolove     |
| 57 sample | edge | enjoy   | nogoodasoth | 0           | enjoy--nogoodasoth  |
| 60 sample | edge | nogood  | nogoodasoth | 0           | nogood--nogoodasoth |
| 67 sample | edge | miser   | evthwrong   | 0           | miser--evthwrong    |
| 30 sample | edge | enjoy   | badpers     | -0,00987258 | enjoy--badpers      |
| 23 sample | edge | enjoy   | selfhate    | -0,02199063 | enjoy--selfhate     |
| 31 sample | edge | tired   | badpers     | -0,02680966 | tired--badpers      |

This table depicts the edge weights of the two nodes as regularized partial correlations:

Tired = Felt tired; selfhate = I hated myself; restl = Restless;

no love = Nobody really loved me; nogoodasoth = Not as good as other kids;

nogood = I was no good anymore; miser = Miserable/unhappy; lonl = Felt lonely;

evthwrong = Did everything wrong; enjoy = Did not enjoy anything; cried = Cried a lot;

concent = Hard to concentrate; badpers = I was a bad person
